# Supplementary material for: Duration of Social Isolation Affects Production of Nitric Oxide in the Rat Brain
Source: MDPI journal article supplement (doi:10.3390/ijms221910340), 2021-09-25
Supplement: s1 [file s1]

# **Duration of Social Isolation Affects Production of Nitric Oxide in the Rat Brain**

**Stanislava Vrankova <sup>1,\*</sup>, Zuzana Galandakova <sup>1</sup>, Jakub Benko <sup>1</sup>, Martina Cebova <sup>1</sup>, Igor Riecansky <sup>1,2,3</sup> and Olga Pechanova <sup>1</sup>**

<sup>1</sup> Centre of Experimental Medicine, Institute of Normal and Pathological Physiology,  
Slovak Academy of Sciences, 841 04 Bratislava, Slovakia

<sup>2</sup> Social, Cognitive and Affective Neuroscience Unit, Department of Cognition, Emotion, and Methods in Psychology, Faculty of Psychology, University of Vienna, 1010 Vienna, Austria

<sup>3</sup> Department of Psychiatry, Slovak Medical University, 833 03 Bratislava, Slovakia

## Supplementary tables

|                            | Effect             | <i>F</i> | <i>df</i> | <i>p</i>    | $\eta_p^2$ |
|----------------------------|--------------------|----------|-----------|-------------|------------|
| <b>PPI 76db</b>            | duration           | 2.384    | (1, 34)   | .132        | 0.066      |
|                            | rearing            | 4.609    | (1, 34)   | <b>.039</b> | 0.119      |
|                            | duration * rearing | 0.006    | (1, 34)   | .936        | 1.911      |
| <b>startle reactivity</b>  | duration           | 3.691    | (1, 34)   | .063        | 0.098      |
|                            | rearing            | 1.801    | (1, 34)   | .189        | 0.050      |
|                            | duration * rearing | 0.910    | (1, 34)   | .347        | 0.026      |
| <b>startle habituation</b> | duration           | 0.276    | (1, 34)   | .603        | 0.008      |
|                            | rearing            | 0.230    | (1, 34)   | .635        | 0.007      |
|                            | duration * rearing | 2.414    | (1, 34)   | .129        | 0.066      |

**Table S1. Prepulse inhibition (PPI) of the acoustic startle response at the prepulse intensity 76db, startle reactivity and startle habituation.** Data were analysed using two-way ANOVA and subsequent post-hoc group comparisons using Sidak correction. Significant effects are marked in bold.

| NOS activity                       | Effect             | <i>F</i> | <i>df</i> | <i>p</i>         | $\eta_p^2$ |
|------------------------------------|--------------------|----------|-----------|------------------|------------|
| cerebellum                         | duration           | 31.85    | (1, 34)   | <b>&lt; .001</b> | 0.484      |
|                                    | rearing            | 0.21     | (1, 34)   | .650             | 0.006      |
|                                    | duration * rearing | 18.83    | (1, 34)   | <b>&lt; .001</b> | 0.356      |
| frontal cortex<br>posterior to PFC | duration           | 101.54   | (1, 34)   | <b>&lt; .001</b> | 0.749      |
|                                    | rearing            | 0.23     | (1, 34)   | .633             | 0.006      |
|                                    | duration * rearing | 18.18    | (1, 34)   | <b>&lt; .001</b> | 0.348      |

**Table S2. NOS activity.** Data were analysed using two-way ANOVA and subsequent post-hoc group comparisons using Sidak correction. Significant effects are marked in bold.

| nNOS expression | Effect             | <i>F</i> | <i>df</i> | <i>p</i>         | $\eta_p^2$ |
|-----------------|--------------------|----------|-----------|------------------|------------|
| cerebellum      | duration           | 2.084    | (1, 28)   | .160             | 0.069      |
|                 | rearing            | 0.291    | (1, 28)   | .594             | 0.010      |
|                 | duration * rearing | 0.749    | (1, 28)   | .394             | 0.026      |
| frontal cortex  | duration           | 0.185    | (1, 28)   | .671             | 0.007      |
|                 | rearing            | 0.509    | (1, 28)   | .481             | 0.018      |
|                 | duration * rearing | 0.219    | (1, 28)   | .643             | 0.008      |
| hippocampus     | duration           | 24.051   | (1, 28)   | <b>&lt; .001</b> | 0.462      |
|                 | rearing            | 0.645    | (1, 28)   | .429             | 0.023      |
|                 | duration * rearing | 2.125    | (1, 28)   | .156             | 0.071      |
| striatum        | duration           | 48.564   | (1, 28)   | <b>&lt; .001</b> | 0.634      |
|                 | rearing            | 0.096    | (1, 28)   | .759             | 0.003      |
|                 | duration * rearing | 0.657    | (1, 28)   | .424             | 0.023      |

**Table S3. nNOS expression.** Data were analysed using two-way ANOVA and subsequent post-hoc group comparisons using Sidak correction. Significant effects are marked in bold.

| iNOS expression | Effect             | <i>F</i> | <i>df</i> | <i>p</i>         | $\eta_p^2$ |
|-----------------|--------------------|----------|-----------|------------------|------------|
| cerebellum      | duration           | 5.754    | (1, 28)   | <b>.023</b>      | 0.170      |
|                 | rearing            | 0.385    | (1, 28)   | .540             | 0.014      |
|                 | duration * rearing | 0.037    | (1, 28)   | .849             | 0.001      |
| frontal cortex  | duration           | 0.550    | (1, 28)   | .465             | 0.019      |
|                 | rearing            | 0.047    | (1, 28)   | .831             | 0.002      |
|                 | duration * rearing | 0.332    | (1, 28)   | .569             | 0.012      |
| hippocampus     | duration           | 30.386   | (1, 28)   | <b>&lt; .001</b> | 0.520      |
|                 | rearing            | 11.081   | (1, 28)   | <b>.002</b>      | 0.284      |
|                 | duration * rearing | 0.906    | (1, 28)   | .349             | 0.031      |
| striatum        | duration           | 8.898    | (1, 28)   | <b>.006</b>      | 0.229      |
|                 | rearing            | 0.325    | (1, 28)   | .573             | 0.011      |
|                 | duration * rearing | 0.894    | (1, 28)   | .352             | 0.029      |

**Table S4. iNOS expression.** Data were analysed using two-way ANOVA and subsequent post-hoc group comparisons using Sidak correction. Significant effects are marked in bold.

| CD concentration                   | Effect             | <i>F</i> | <i>df</i> | <i>p</i>      | $\eta_p^2$ |
|------------------------------------|--------------------|----------|-----------|---------------|------------|
| frontal cortex<br>posterior to PFC | duration           | 145.88   | (1, 34)   | < <b>.001</b> | 0.807      |
|                                    | rearing            | 0.09     | (1, 34)   | .772          | 0.002      |
|                                    | duration * rearing | 6.07     | (1, 34)   | <b>.019</b>   | 0.148      |

**Table S5. Concentration of conjugated dienes (CD).** Data were analysed using two-way ANOVA and subsequent post-hoc group comparisons using Sidak correction. Significant effects are marked in bold.
